# Supplementary material
Source: Springer Nature journal article supplement (https://www.springermedizin.de/resource/supplementary/13054_2010_8771_MOESM3_ESM.pdf/9732528)

Incidence of prescribing errors per  
1000 monitored patient-days

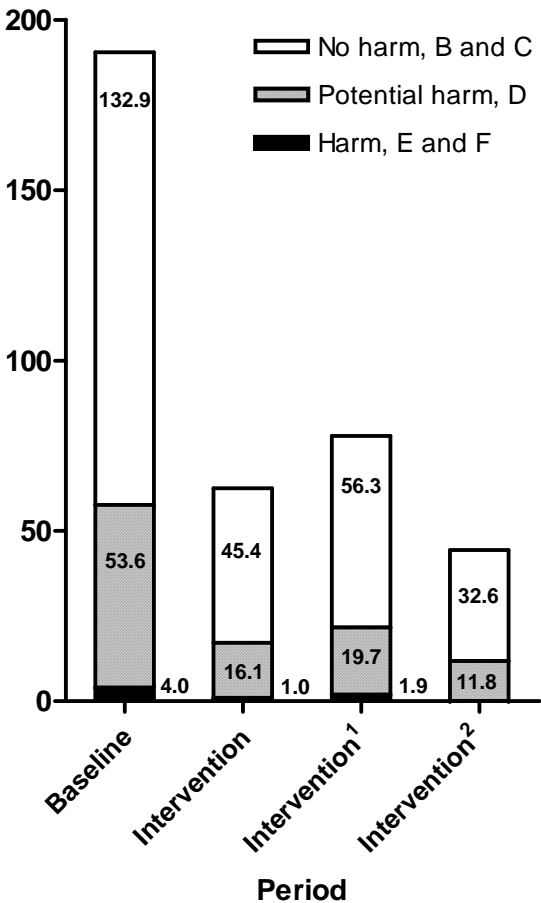

Supplement: MOESM3 [file 9732528]
